# Supplementary material for: Recapitulation of human endochondral ossification by SOX9+ sclerotomal progenitors.
Source: Research Square preprint supplement (doi:10.21203/rs.3.rs-3874372/v1), 2024-01-30
Supplement: Supplementary file 1 [file 8e9b4a30c685ce36ecd527e3.xlsx]

## Sheet: sheet 1
REAGENT or RESOURCE	SOURCE	IDENTIFIER
Antibodies
Rabbit monoclonal anti-Sox9	Huabio	Cat# ET1611-56; RRID:AB_2924312
Rabbit monoclonal anti-Twist1 (E7E2G)	Cell Signaling Technology	Cat# 31174, RRID:AB_2927582
Mouse monoclonal anti-Collagen II	ThermoFisher	Cat# MA5-12789; RRID:AB_10986605
Rabbit polyclonal anti-Oct4	Abcam	Cat# ab19857, RRID:AB_445175
Rabbit monoclonal anti-Sox2	Abcam	Cat# ab97959, RRID:AB_2341193
Mouse monoclonal anti-Ku80 (Stem 101)	Takara	Cat# Y40400; RRID:AB_2895096
Mouse monoclonal anti-Collagen X	ThermoFisher	Cat# 14-9771-82; RRID:AB_2573018
Mouse monoclonal anti-Collagen I	Santa Cruz Biotechnology	Cat# sc-293182; RRID:AB_2797597
Rat monoclonal anti-Endomucin	Santa Cruz Biotechnology	Cat# sc-65495; RRID:AB_2100037
Mouse monoclonal anti-SCF	Santa Cruz Biotechnology	Cat# sc-13126; RRID:AB_628238
Mouse monoclonal anti-CXCL12	Santa Cruz Biotechnology	Cat# sc-74271; RRID:AB_2088298
Rabbit polyclonal anti-Aggrecan	Proteintech	Cat# 13880-1-AP, RRID:AB_2722780
Rabbit monoclonal anti-PCNA (D3H8P)	Cell Signaling Technology	Cat# 13110, RRID:AB_2636979
Rabbit monoclonal anti-human Vimentin	Abcam	Cat# ab16700, RRID:AB_443435
Biotin anti-mouse CD45	BioLegend	Cat# 103103 (also 103104); RRID:AB_312968
Rabbit Anti-Human Lubricin Polyclonal Antibody	Abcam	Cat# ab28484, RRID:AB_776089
Mouse monoclonal anti-Leptin Receptor	Santa Cruz Biotechnology	Cat# sc-8391; RRID:AB_627882
Rabbit monoclonal anti-VEGF	Huabio	Cat# ET1604-28; RRID:AB_2941866
Rabbit monoclonal anti-SCD1 (C12H5)	Cell Signaling Technology	Cat# 2794; RRID:AB_2183099
Rabbit polyclonal anti-COMP	Proteintech	Cat# 28369-1-AP; RRID: AB_2881126
Mouse monoclonal anti-Integrin α9β1	BioLegend	Cat# 351602; RRID:AB_10901165
TotalSeq™-A0251 anti-human Hashtag 1	BioLegend	Cat# 394601; RRID:AB_2750015
TotalSeq™-A0252 anti-human Hashtag 2	BioLegend	Cat# 394603; RRID:AB_2750016
TotalSeq™-A0253 anti-human Hashtag 3	BioLegend	Cat# 394605; RRID:AB_2750017
TotalSeq™-A0254 anti-human Hashtag 4	BioLegend	Cat# 394607; RRID: AB_2750018
Mouse IgG1 kappa	ThermoFisher	Cat# 14-4714-82; RRID:AB_470111
Mouse IgG2a kappa	ThermoFisher	Cat# 14-4724-81; RRID:AB_470113
Mouse IgG3	ThermoFisher	Cat# 14-4742-82; RRID:AB_470120
Rabbit IgG	Abcam	Cat# ab172730; RRID:AB_2687931
FITC Mouse IgG2a, κ Isotype Ctrl Antibody	BioLegend	Cat# 400207, RRID:AB_2884007
FITC Mouse IgG1, κ Isotype Ctrl (FC) Antibody	BioLegend	Cat# 400109, RRID:AB_2861401
APC Mouse IgG2b, κ Isotype Ctrl Antibody	BioLegend	Cat# 401209, RRID:AB_2941901
FITC anti-human CD90 (Thy1)	BioLegend	Cat# 328107, RRID:AB_893438
FITC anti-human CD14	BioLegend	Cat# 301803, RRID:AB_314185
APC anti-human CD105	BioLegend	Cat# 323207, RRID:AB_755959
APC anti-human CD34	BioLegend	Cat# 343509, RRID:AB_1877154
PE anti-human CD19	BioLegend	Cat# 302207, RRID:AB_314237
PE anti-human CD45	BioLegend	Cat# 304007, RRID:AB_314395
PE anti-human CD73 (Ecto-5'-nucleotidase)	BioLegend	Cat# 344004 (also 344003), RRID:AB_2298698
FITC anti-human CD164	BioLegend	Cat# 324806 (also 324805), RRID:AB_2072588
Streptavidin, (APC-Alexa Fluor™ 750)	Thermo Fisher Scientific	Cat# SA1027, RRID:AB_2716627
Pacific Blue(TM) anti-human CD45	BioLegend	Cat# 304029 (also 304021, 304022), RRID:AB_2174123
Podoplanin Monoclonal Antibody (NZ-1.3), APC, eBioscience	Thermo Fisher Scientific	Cat# 17-9381-42, RRID:AB_10801951
PE/Cyanine7 anti-human CD146 (MUC18, Mel-CAM)	BioLegend	Cat# 342010 (also 342009), RRID:AB_10644009
APC anti-human HLA-DR	BioLegend	Cat# 327021, RRID:AB_2734310
Biotin anti-human CD202b (Tie2/Tek)	BioLegend	Cat# 334204, RRID:AB_1186046
CD31 (PECAM-1) Monoclonal Antibody (WM-59 (WM59)), Biotin, eBioscience	Thermo Fisher Scientific	Cat# 13-0319-82, RRID:AB_466423
Pacific Blue(TM) anti-human CD235ab	BioLegend	Cat# 306612 (also 306611),RRID:AB_2116241
Alexa fluor-568 donkey anti-rabbit	ThermoFisher	Cat# A10042; RRID:AB_2534017
Alexa fluor-647 donkey anti-rabbit	ThermoFisher	Cat# A31573; RRID:AB_2536183
Alexa fluor-488 donkey anti-rat	ThermoFisher	Cat# A-21208, RRID:AB_2535794
Alexa fluor-647 donkey anti-rat	ThermoFisher	Cat# A78947, RRID:AB_2910635
Alexa fluor-488 goat anti-mouse	ThermoFisher	Cat# A-11029; RRID:AB_2534088
Alexa fluor-568 goat anti-mouse	ThermoFisher	Cat# A-11004; RRID:AB_2534072
Deposited data
Raw and analyzed data of bulk-population RNA-seq	This paper	GEO: GSE222109
Raw data and processed data of single-cell RNA-seq	This paper	GEO: GSE232109
Mouse organogenesis single-cell RNA seq atlas	Cao et al. 2019	GEO: GSE119945
Experimental models: Organisms/strains
Mouse: NOD/ShiLtJGpt-Prkdcem26Cd52/Gpt	GemPharmatech	Strain No.T001492; RRID:IMSR_GPT:T001492
Oigonucleotides
Primers	This paper	Table S1
Software and algorithms
ImageJ	https://imagej.nih.gov/ij/	RRID:SCR_003070
edgeR	http://bioconductor.org/packages/edgeR	RRID:SCR_012802
Seurat	https://satijalab.org/seurat/get_started.html	RRID:SCR_016341
CeleScope	https://github.com/singleron-RD/CeleScope	RRID:SCR_023553
Monocle2	http://cole-trapnell-lab.github.io/monocle-release/docs/	RRID:SCR_016339
FlowJo	https://www.flowjo.com/	RRID:SCR_008520
Microsoft Excel	https://www.microsoft.com/en-gb/	RRID:SCR_016137
CASAVA	http://support.illumina.com/sequencing/sequencing_software/casava.html	RRID:SCR_001802
HISAT2	http://ccb.jhu.edu/software/hisat2/index.shtml	RRID:SCR_015530
featureCounts	http://bioinf.wehi.edu.au/featureCounts/	RRID:SCR_012919
