# Supplementary material for: Recapitulation of human endochondral ossification by SOX9+ sclerotomal progenitors.
Source: Research Square preprint supplement (doi:10.21203/rs.3.rs-3874372/v1), 2024-01-30
Supplement: Supplementary file 2 [file ef1453a68ce168438deb5ee9.xlsx]

## Sheet: qPCR primers
Primers for RT-qPCR
Gene name	Primer name	Sequence (5' to 3')
Actb	forward	CACCATTGGCAATGAGCGGTTC
	reverse	AGGTCTTTGCGGATGTCCACGT
Oct4	forward	GACAGGGGGAGGGGAGGAGCTAGG
	reverse	CTTCCCTCCAACCAGTTGCCCCAAAC
Nanog	forward	CAGCCCAGATTCTTCCACCAGTCCC
	reverse	CGGAAGCTTCCCAGTCGGGTTCACC
Tbxt	forward	CACTGCATCTTTCGGGACCT
	reverse	GACATCGTGGACAGCCAGTA
Mixl1	forward	GGTACCCCGACATCCACTTG
	reverse	ACCTGGAAGAGGGGAGAAAAT
Tbx6	forward	GCGCGGTGTATGGTAGAGG
	reverse	CTACTCGGCTGCATTTCTGG
Msgn1	forward	CTGCACACCCTCCGGAATTA
	reverse	AGGAGGTCTGTGAGTTCCCC
Sox9	forward	GGCAAGCTCTGGAGACTTCTG
	reverse	CCCGTTCTTCACCGACTTCC
Twist1	forward	CTGCAGCACCGGCACCGTTT
	reverse	CCCAACGGCTGGACGCACAC
Pax1	forward	GCAGCAATGACCTTCAAGCA
	reverse	GTGTAAGCTACTGAGGGCGT
Nkx3-2	forward	GCTGGGAGCTTTCTGCACTA
	reverse	TTCGCACCCCTTGGTTACAA
Pax9	forward	GGGCTATTCTCCGAGCATCT
	reverse	CACCTGGGTGACTGCGG
Col2a1	forward	CCAGATGACCTTCCTACGCC
	reverse	TTCAGGGCAGTGTACGTGAAC
Sox5	forward	CAGCCAGAGTTAGCACAATAGG
	reverse	CTGTTGTTCCCGTCGGAGTT
Sox6	forward	AGGGAGTCTTGCCGATGTG
	reverse	CAGGCTCTCAGGTGTACCTTTA
Col9a1	forward	GGGACTGTTGGCAAACAAAGA
	reverse	ATTGACAGGGAATCTGGGGC
Comp	forward	CAGAAGAGCAACCCGGATCA
	reverse	TGTCCCGAGAGTCCTGATGT
Acan	forward	AGGGCGAGTGGAATGATGTT
	reverse	GTTTGTAGGTGGTGGCTGTGC
Epyc	forward	AGGTCAGAGCCAAAGGAAAGC
	reverse	CTCTAGAGTTGGGGCAGTCAC
Fat4	forward	AGCACATCGAGATGCCCAAA
	reverse	AAGCTATGCTTCCCGCTGAA
Itga9	forward	CACGTCCATCACCGGAATCA
	reverse	TGGGCTGAAAGTGACACTCC
Pdgfra	forward	GATTGTGGTCACCTGTGCTG
	reverse	TCTTCCAGCATTGTGATGCC
Flrt2	forward	GTCTTCCCTTTCCACCTCCC
	reverse	CTCAATCTGCAATCTGACGGC
Ncam1	forward	CAGCCAGTCCAAGGGGAAC
	reverse	TAGTGTCTGATGGGGGAGCC
Plxna2	forward	CCTGGAAAAGCAACTGCCTC
	reverse	TCAAACACGAACTGGGGGTT
Pax3	forward	CAGGTACCAGGAGACTGGCT
	reverse	AGGCGTTGTCACCTGCTTG
Ripply	forward	GCACTCCCTGGCCTGTTAAG
	reverse	TCCAGAGACAAGTTCCTCTTTCA
